# Supplementary material
Source: Springer Nature journal article supplement (https://www.springermedizin.de/resource/supplementary/12888_2012_1342_MOESM1_ESM.pdf/9479912)
Supplement: MOESM1 [file 9479912]

Eligible subjects  
(Psychiatrists as of March, 2011)  
 $n = 3122$

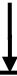

Random sample  
(Available email accounts)  
 $n = 2715$

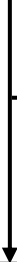

Not delivered  
Bounced email  $n = 820$   
Opted out  $n = 34$

Total sent survey link  
 $n = 1861$

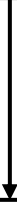

Total number of responses  
 $n = 386$

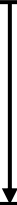

Missing data  $n=7$

Total subjects of analysis  
 $n = 379$
